# Supplementary material
Source: publisher figshare collection journal article supplement (https://tandf.figshare.com/ndownloader/files/24685149)
Supplement: Supplementary file 1 [file 24685149]

Appendix 1. Interview guide

| **Interview questions** | **Prompt** |
| --- | --- |
| 1. Can you tell us about the occurrence of your stroke and your recovery? | - When did you have a stroke? - What happened? - How long did you stay in the hospital? - What happened after you were discharged from the hospital? - How did you/your family/doctors decide that you can go home? |
| 1. How do you view your recovery? | - What does recovery mean to you? - What were your goals during your recovery process? - How did you recover since stroke? - Are you satisfied with your recovery? Why or why not? |
| 1. Tell us about your experience of rehabilitation. | - How long have you been receiving rehabilitation? - What made you decide to seek rehabilitation? - What are your goals of rehabilitation? - Has rehabilitation contributed to your recovery? In what way? - By when will you stop seeking rehabilitation? |
| 1. Is there anything that (anyone who) contributed to your recovery? | - What (Who) are these things (people)? - How did these things (people) help your recovery? |
| 1. Is there anything that (anyone who) may have impeded your recovery? | - What (Who) are these things (people)? - How did these things (people) hamper your recovery? |
